# Supplementary material for: Five-year costs from a randomised comparison of bilateral and single internal thoracic artery grafts
Source: PubMed Central journal article supplement (PMC6678045; doi:10.1136/heartjnl-2018-313932), 2019-04-04
Supplement: heartjnl-2018-313932supp001.pdf [file heartjnl-2018-313932supp001.pdf]

S Table 1: Unit costs used to value resource use data collected from ART

| Resource category                                  | Unit cost (2016/17 GBP/£) | Assumptions and Source                                                                                                                                           |
|----------------------------------------------------|---------------------------|------------------------------------------------------------------------------------------------------------------------------------------------------------------|
| Health care contact at follow-up                   |                           |                                                                                                                                                                  |
| <b>GP clinic attendance</b>                        | 37.00                     | Unit Costs of Health and Social Care 2017 (section 10.3b). Per surgery consultation lasting 9.22 minutes.                                                        |
| <b>Visits to practice nurse</b>                    | 14.47                     | Unit Costs of Health and Social Care 2017. Per patient contact lasting 15.5 minutes                                                                              |
| <b>Outpatient clinic attendance</b>                | 128.72                    | NHS Reference Costs – Total Outpatient Attendance - Cardiology outpatient clinic (320).                                                                          |
| <b>Cardiac rehabilitation clinic attendance</b>    | 72.96                     | NHS Reference Costs – Total Outpatient Attendance - Cardiac rehabilitation outpatient clinic (327).                                                              |
| <b>Hospital re-admission bed day</b>               | 305.85                    | NHS Reference Costs – Index - Non-elective inpatient excess bed day cost. Weighted average of all admission types.                                               |
| Medications at follow-up (per day)                 |                           |                                                                                                                                                                  |
| <b>Aspirin</b>                                     | 0.01                      | 75mg per day for duration of follow-up.                                                                                                                          |
| <b>Clopidogrel</b>                                 | 0.02                      | 75 mg per day for a period of three months unless otherwise stated.                                                                                              |
| <b>Warfarin</b>                                    | 0.02                      | 6mg per day for duration of follow-up.                                                                                                                           |
| <b>Beta-blockers</b>                               | 0.01                      | Assumed drug is Bisoprolol at 5mg per day for duration of follow-up.                                                                                             |
| <b>Calcium-channel antagonists</b>                 | 0.01                      | Assumed drug is Amlodipine at 5mg per day for duration of follow-up.                                                                                             |
| <b>Nitrates</b>                                    | 0.07                      | Assumed drug is Isosorbide Mononitrate at 40mg per day for duration of follow-up.                                                                                |
| <b>Potassium channel activators</b>                | 0.13                      | Assumed drug is Nicorandil at 40mg per day for duration of follow-up.                                                                                            |
| <b>Statins</b>                                     | 0.03                      | Assumed half of patients received Simvastatin at 40mg per day and half Atorvastatin at 80mg per day for duration of follow-up.                                   |
| <b>Other lipid lowering drugs</b>                  | 0.00                      | Assumed drug is Ezetimibe at 10mg per day -up.                                                                                                                   |
| <b>ACE inhibitors</b>                              | 0.02                      | Assumed drug is Ramipril at 5mg per day.                                                                                                                         |
| <b>Angiotensin-II antagonists</b>                  | 0.03                      | Assumed half of patients received Losartan at 100mg per day and half Candesartan at 32mg per day for duration of follow-up.                                      |
| <b>Diuretics</b>                                   | 0.00                      | Assumed drug is Furosemide at 40mg per day for a period of four weeks after surgery.                                                                             |
| <b>Digoxin</b>                                     | 0.02                      | 250mcg per day for duration of follow-up.                                                                                                                        |
| <b>Amiodarone</b>                                  | 0.11                      | 600mg per day for duration of follow-up.                                                                                                                         |
| Adverse events at follow-up requiring admission    |                           |                                                                                                                                                                  |
| <b>Myocardial infarction</b>                       | 2213.04                   | NHS Reference Costs – Non-elective inpatient - Actual or Suspected Myocardial Infarction (weighted average across CC scores) (EB10).                             |
| <b>Cerebrovascular accident</b>                    | 3558.94                   | NHS Reference Costs – Non-elective inpatient - Cerebrovascular Accident, Nervous System Infections or Encephalopathy (weighted average across CC scores) (AA22). |
| <b>Further CABG</b>                                | 9804.89                   | NHS Reference Costs – Non-elective inpatient – Complex / Major / Standard Coronary Artery Bypass Graft (weighted average across CC scores) (ED26/7/8).           |
| <b>Further PCI</b>                                 | 3655.15                   | NHS Reference Costs – Non-elective inpatient – Complex / Standard Percutaneous Transluminal Coronary Angioplasty (weighted average across CC scores) (EY40/1).   |
| <b>Revascularisation with catheterisation only</b> | 3582.59                   | NHS Reference Costs – Non-elective inpatient - Complex / Standard Cardiac Catheterisation Angioplasty (weighted average across CC scores) (EY42/3).              |
| <b>Major bleed</b>                                 | 5953.62                   | Assumed to require surgery for investigation and to incur the same cost as sternal wound infection requiring reconstruction.                                     |
| <b>Other adverse events</b>                        | Various                   | Costed by associated length of hospital stay using the cost of a non-elective inpatient excess bed day (£305.85 per day).                                        |
| Adverse events at follow-up without admission      |                           |                                                                                                                                                                  |
| <b>Myocardial infarction</b>                       | 521.99                    | NHS Reference Costs - Day case - Actual or Suspected Myocardial Infarction, General day case (weighted average across CC scores) (EB10).                         |
| <b>Cerebrovascular accident</b>                    | 561.75                    | NHS Reference Costs – Day case - Cerebrovascular Accident, Nervous System Infections or Encephalopathy (weighted average across CC scores) (AA22).               |
| <b>Further PCI</b>                                 | 1980.06                   | NHS Reference Costs– Day case - Complex / Standard Percutaneous Transluminal Coronary Angioplasty (weighted average across CC scores) (EY40/1).                  |
| <b>Major bleed</b>                                 | 5953.62                   | Assumed to require surgery for investigation and to incur the same cost as sternal wound infection requiring reconstruction.                                     |
| <b>Revascularisation with catheterisation only</b> | 1001.19                   | NHS Reference Costs– Day case - Complex / Standard Cardiac Catheterisation (weighted average across CC scores) (EY42/3).                                         |

|                                                                           |         |                                                                                                                                                                                                                        |
|---------------------------------------------------------------------------|---------|------------------------------------------------------------------------------------------------------------------------------------------------------------------------------------------------------------------------|
| <b>Emergency investigations</b>                                           | 258.38  | NHS Reference Costs– A&E category 4 or 5 treatment (weighted average). Used as an estimate for day hospital cost for patients not admitted.                                                                            |
| Theatre Resource Use                                                      |         |                                                                                                                                                                                                                        |
| <b>Operating theatre time (per minute)</b>                                | 24.74   | Average of theatre running costs (inclusive of staff) divided by theatre hours for cardiology at 8 boards in Scotland carrying out CABG (cardiac surgery).                                                             |
| <b>Drugs for anaesthetic induction</b>                                    | 4.81    | Assuming 1mg Fentanyl , 5mg Midazolam, 1 amp (4mg) Pancuronium bromide                                                                                                                                                 |
| <b>Muscle relaxant maintenance</b>                                        | 9.03    | Assuming 2 amps of Pancuronium bromide.                                                                                                                                                                                |
| <b>Inhalational anaesthetics (per minute)</b>                             | 0.00    | Assuming Isoflurane at a concentration of 50% and fresh gas flow of 3 litres per min.                                                                                                                                  |
| <b>Consumables (all procedures)</b>                                       | 416.25  | Gray et al. 2017 inflated to 2016/17 prices using PSSRU HCS inflation index.                                                                                                                                           |
| <b>Additional consumables (on-pump procedures)</b>                        | 104.06  | Gray et al. 2017 inflated to 2016/17 prices using PSSRU HCS inflation index.                                                                                                                                           |
| <b>Bypass machine time (per hour)</b>                                     | 15.21   | Machine purchase cost plus maintenance contract annuitised assuming a machine lifespan of 7 years and assuming a 3.5% discount rate. Annual usage of machine is assumed to be eight hours per day, five days per week. |
| <b>Unit of red blood cells</b>                                            | 120.00  | Assuming 294ml mean volume per unit.                                                                                                                                                                                   |
| <b>Unit of platelets</b>                                                  | 193.15  | Assuming 297ml mean volume per unit.                                                                                                                                                                                   |
| <b>Unit of fresh frozen plasma</b>                                        | 28.46   | Assuming 246ml mean volume per unit.                                                                                                                                                                                   |
| <b>Unit of cryoprecipitate (pooled)</b>                                   | 177.57  | Assuming 187ml mean volume per unit                                                                                                                                                                                    |
| <b>Laboratory issuing costs per blood product unit</b>                    | 2.08    | Campbell et al. 2015 inflated to 2016/17 prices using PSSRU HCS inflation index.                                                                                                                                       |
| <b>Cell saver machine (per hour)</b>                                      | 1.44    | Machine purchase cost plus maintenance contract annuitised assuming a machine lifespan of 7 years and assuming a 3.5% discount rate. Annual usage of machine is assumed to be eight hours per day, five days per week. |
| <b>Cell saver consumables</b>                                             | 104.06  | Gray et al. 2017 inflated to 2016/17 prices using PSSRU HCS inflation index.                                                                                                                                           |
| <b>Aprotinin (per dose)</b>                                               | 333.37  | Assuming one-off cost for 6 million Kallikrein Inhibitor Units intravenously; 2012/13 cost inflated to 2016/17 cost year using HCHS Inflation Index.                                                                   |
| Post-theatre Resource Use                                                 |         |                                                                                                                                                                                                                        |
| <b>Ventilator</b>                                                         | 37.78   | Dasta et al. 2005 inflated to 2016/17 prices using PSSRU HCS inflation index.                                                                                                                                          |
| <b>Intra-aortic balloon pump plus pressure transducer (per insertion)</b> | 582.75  | Gray et al. 2017 inflated to 2016/17 prices using PSSRU HCS inflation index.                                                                                                                                           |
| <b>Inotrope drug days</b>                                                 |         |                                                                                                                                                                                                                        |
| <b>Adrenaline</b>                                                         | 12.75   | Assuming average dose of 0.08 mcg/kg/min, 4mg in total volume 50ml with 5% Dextrose                                                                                                                                    |
| <b>Noradrenaline</b>                                                      | 5.20    | Assuming average dose of 0.05 mcg/kg/min, 4mg in total volume 50ml with 5% Dextrose.                                                                                                                                   |
| <b>Dobutamine</b>                                                         | 3.98    | Assuming average dose of 6 mcg/kg/min, 250mg in total volume 50ml with 5%                                                                                                                                              |
| <b>Renal support therapy (per day)</b>                                    | 328.38  | NHS reference cost – Renal - Haemodialysis for Acute Kidney Injury, 19 years and over (LE01A)                                                                                                                          |
| <b>Haemofiltration (single dose)</b>                                      |         |                                                                                                                                                                                                                        |
| <b>Mannitol</b>                                                           | 6.15    | Assumes a one off dose of 0.2-2g/kg intravenously.                                                                                                                                                                     |
| <b>Frusemide</b>                                                          | 0.09    | Assumes a one off dose of 20-50mg intravenously.                                                                                                                                                                       |
| <i>Treatment of sternal wound infection</i>                               |         |                                                                                                                                                                                                                        |
| <b>Antibiotics for superficial SWI (per course)</b>                       | 10.32   | Assuming antibacterial protocol of 1g Flucloxacillin IV 4 times daily for 2 days; and either 2g Flucloxacillin IV once daily, 500mg Cefalexin 3 times daily, or 450mg Clindamycin 3 times daily for 5 days.            |
| <b>Antibiotics for deep sternal wound infection (per course)</b>          | 106.23  | Assuming antibacterial protocol of 500mg Meropenem and 600mg iv for 3 doses, then 600mg Teicoplanin IV once daily, then 3 times daily for 7 days.                                                                      |
| <b>VAC Dressing (per episode)</b>                                         | 303.44  | Gray et al. 2017 inflated to 2016/17 prices using PSSRU HCS inflation index. Includes VAC canister, dressing and machine and assumes three applications. Costs provided by trial participating hospital.               |
| <b>Debridement procedures</b>                                             | 2984.82 | Assumed to require two hours of theatre time and prophylactic antibiotics. Time costed using theatre and anaesthetic drug costs                                                                                        |
| <b>Surgical reconstruction</b>                                            | 5953.62 | Assumed to require four hours of theatre time and prophylactic antibiotics. Time costed using theatre and anaesthetic drug costs                                                                                       |
| SAEs during index admission                                               |         |                                                                                                                                                                                                                        |

|                                         |         |                                                                                                                                                                                                                                                                                                    |
|-----------------------------------------|---------|----------------------------------------------------------------------------------------------------------------------------------------------------------------------------------------------------------------------------------------------------------------------------------------------------|
| <b>Myocardial infarction</b>            | 880.06  | NHS Reference Costs – Non-elective inpatient - Actual or Suspected Myocardial Infarction (weighted average across CC scores) (EB10), less inpatient bed days costed using average excess bed day cost for the same currency code (weighted average across CC scores).                              |
| <b>Cerebrovascular accident</b>         | 1195.47 | NHS Reference Costs – Non-elective inpatient - Cerebrovascular Accident, Nervous System Infections or Encephalopathy (weighted average across CC scores) (AA22), less inpatient bed days costed using average excess bed day cost for the same currency codes (weighted average across CC scores). |
| <b>Further CABG</b>                     | 6794.63 | NHS Reference Costs – Non-elective inpatient – Complex / Major / Standard Coronary Artery Bypass Graft (weighted average across CC scores) (ED26/7/8), less inpatient bed days costed using average excess bed day cost for the same currency codes (weighted average across CC scores).           |
| <b>Further PCI</b>                      | 2079.82 | NHS Reference Costs – Non-elective inpatient – Complex / Standard Percutaneous Transluminal Coronary Angioplasty (weighted average across CC scores) (EY40/1), less inpatient bed days costed using average excess bed day cost for the same currency codes (weighted average across CC scores).   |
| <b>Cardiac catheterisation only</b>     | 1607.76 | NHS Reference Costs – Non-elective inpatient - Complex / Standard Cardiac Catheterisation Angioplasty (weighted average across CC scores) (EY42/3), less inpatient bed days costed using average excess bed day cost for the same currency codes (weighted average across CC scores).              |
| <b>Major bleed</b>                      | 5953.62 | Assumed to require surgery for investigation and to incur the same cost as sternal wound infection requiring reconstruction.                                                                                                                                                                       |
| Inpatient bed days                      |         |                                                                                                                                                                                                                                                                                                    |
| <b>Intensive Therapy Unit</b>           | 624.96  | NHS Reference costs - Critical care - weighted average across all unventilated critical care service codes (CCU01-91) (Currency code: XC07Z).                                                                                                                                                      |
| <b>High Dependency Unit</b>             | 385.03  | Gray et al. 2017 inflated to 2016/17 prices using PSSRU HCS inflation index.                                                                                                                                                                                                                       |
| <b>Cardiac Ward</b>                     | 348.44  | NHS Reference costs - Non Elective Inpatients Excess Bed Days - Complex / Major / Standard Coronary Artery Bypass Graft (weighted average across CC scores) (ED26/7/8)                                                                                                                             |
| Post-hospital discharge                 |         |                                                                                                                                                                                                                                                                                                    |
| <b>Other hospital (per day)</b>         | 348.44  | Assumed same bed day cost as for cardiac ward above.                                                                                                                                                                                                                                               |
| <b>Nursing home (per day)</b>           | 158.29  | Unit Costs of Health and Social Care 2017 (section 1.3).                                                                                                                                                                                                                                           |
| <b>Rehabilitation unit (total cost)</b> | 2922.06 | Unit Costs of Health and Social Care 2014 (section 1.6) inflated to 2016/17 prices using the PSSRU HCS inflation index. Assumes an average stay of 33 days.                                                                                                                                        |



S Table 3: Sensitivity analysis showing mean costs for a “available case” analysis

|                                               | Year 1<br>Mean cost |      | Year 2<br>Mean cost |      | Year 3<br>Mean cost |      | Year 4<br>Mean cost |      | Year 5<br>Mean cost |      | Total at year 5<br>Mean difference (95% CI, p value) |      |                              |
|-----------------------------------------------|---------------------|------|---------------------|------|---------------------|------|---------------------|------|---------------------|------|------------------------------------------------------|------|------------------------------|
|                                               | SITA                | BITA | SITA                | BITA | SITA                | BITA | SITA                | BITA | SITA                | BITA | SITA                                                 | BITA | BITA vs SITA                 |
| <b>Healthcare contacts</b>                    |                     |      |                     |      |                     |      |                     |      |                     |      |                                                      |      |                              |
| <b>GP visits</b>                              | 243                 | 238  | 165                 | 162  | 153                 | 148  | 147                 | 138  | 140                 | 140  | 779                                                  | 759  | -19.4 (-61.3, 22.5; 0.350)   |
| <b>Nurse visits</b>                           | 46                  | 50   | 17                  | 21   | 21                  | 21   | 21                  | 23   | 20                  | 22   | 117                                                  | 130  | 11.9 (-7.4, 31.3; 0.217)     |
| <b>Outpatient clinic visits</b>               | 247                 | 317  | 153                 | 173  | 128                 | 166  | 158                 | 150  | 144                 | 148  | 774                                                  | 859  | 122.9 (53.5, 192.2; 0.001)   |
| <b>Cardiac rehabilitation visits</b>          | 463                 | 476  | 89                  | 85   | 68                  | 46   | 54                  | 75   | 41                  | 43   | 696                                                  | 717  | 9.6 (-173.2, 192.3; 0.915)   |
| <b>Number of nights in hospital</b>           | 849                 | 1029 | 247                 | 203  | 237                 | 203  | 234                 | 235  | 260                 | 242  | 1675                                                 | 1704 | 74.7 (-165.0, 314.4; 0.528)  |
| <b>Medications</b>                            |                     |      |                     |      |                     |      |                     |      |                     |      |                                                      |      |                              |
| <b>Total medication</b>                       | 38                  | 38   | 40                  | 42   | 41                  | 45   | 42                  | 47   | 42                  | 43   | 189                                                  | 201  | 11.9 (-3.5, 27.3; 0.125)     |
| <b>Adverse event treatment</b>                |                     |      |                     |      |                     |      |                     |      |                     |      |                                                      |      |                              |
| <b>Myocardial infarction</b>                  | 16                  | 13   | 3                   | 5    | 3                   | 9    | 9                   | 6    | 11                  | 11   | 38                                                   | 40   | -1.6 (-20.9, 17.7; 0.866)    |
| <b>Cerebrovascular accident</b>               | 20                  | 11   | 10                  | 13   | 12                  | 5    | 6                   | 11   | 24                  | 18   | 65                                                   | 51   | -11.6 (-42.7, 19.4; 0.448)   |
| <b>Further CABG</b>                           | 0                   | 7    | 0                   | 0    | 0                   | 7    | 0                   | 0    | 0                   | 0    | 0                                                    | 15   | 13.9 (-4.1, 31.8; 0.125)     |
| <b>Further PCI</b>                            | 56                  | 41   | 45                  | 24   | 42                  | 44   | 18                  | 28   | 34                  | 26   | 176                                                  | 155  | -30.3 (-97.7, 37.0; 0.363)   |
| <b>Revascularisation with catheter</b>        | 3                   | 19   | 14                  | 20   | 24                  | 14   | 17                  | 10   | 1                   | 16   | 54                                                   | 76   | 24.3 (-18.1, 66.8; 0.250)    |
| <b>Sternal wound problems</b>                 | 104                 | 289  | 1                   | 0    | 0                   | 0    | 0                   | 1    | 0                   | 0    | 105                                                  | 265  | 184.4 (43.6, 325.2; 0.012)   |
| <b>Major bleed</b>                            | 35                  | 25   | 0                   | 0    | 0                   | 0    | 0                   | 1    | 0                   | 0    | 31                                                   | 26   | -10.0 (-46.8, 26.8; 0.582)   |
| <b>Other AEs (cost of hospital stay only)</b> | 458                 | 504  | 203                 | 174  | 182                 | 142  | 188                 | 207  | 285                 | 216  | 1184                                                 | 1138 | -73.5 (-365.2, 218.2; 0.610) |
| <b>Death (cost of hospital stay only)</b>     | 40                  | 4    | 5                   | 0    | 2                   | 7    | 10                  | 2    | 0                   | 5    | 58                                                   | 15   | -33.9 (-97.0, 29.1; 0.279)   |
| <b>n</b>                                      | 1444                | 1414 | 1435                | 1390 | 1376                | 1322 | 1269                | 1245 | 1196                | 1215 | 1029                                                 | 1038 |                              |

S Table 4: Costs for subgroups: diabetes

|                                               | No history of diabetes |       |                             | Insulin dependent diabetes |       |                              | Non-insulin dependent diabetes |       |                              |
|-----------------------------------------------|------------------------|-------|-----------------------------|----------------------------|-------|------------------------------|--------------------------------|-------|------------------------------|
|                                               | SITA                   | BITA  | BITA vs SITA                | SITA                       | BITA  | BITA vs SITA                 | SITA                           | BITA  | BITA vs SITA                 |
| <b>Total cost of index admission</b>          | 11775                  | 12562 | 787 (-30.1, 1604.5; 0.058)  | 12458                      | 14426 | 1968 (-154.6, 4090.4; 0.067) | 12279                          | 13047 | 768 (-468.2, 2005.1; 0.211)  |
| <b>Total costs of discharge locations</b>     | 650                    | 551   | -100 (-486.3, 286.4; 0.599) | 341                        | 532   | 191 (-106.0, 487.0; 0.195)   | 371                            | 548   | 177 (-275.6, 629.9; 0.427)   |
| <b>GP visits</b>                              | 830                    | 799   | -30 (-83.6, 22.8; 0.250)    | 943                        | 987   | 44 (-164.3, 252.3; 0.664)    | 938                            | 916   | -22 (-143.5, 98.6; 0.705)    |
| <b>Nurse visits</b>                           | 117                    | 126   | 9 (-9.7, 28.6; 0.320)       | 123                        | 225   | 102 (-76.2, 279.9; 0.247)    | 141                            | 129   | -12 (-47.4, 23.6; 0.495)     |
| <b>Outpatient clinic visits</b>               | 802                    | 883   | 81 (-62.6, 225.6; 0.255)    | 1124                       | 2114  | 990 (-326.9, 2306.8; 0.133)  | 824                            | 865   | 41 (-107.8, 188.9; 0.576)    |
| <b>Cardiac rehabilitation visits</b>          | 649                    | 654   | 5 (-183.0, 193.0; 0.957)    | 300                        | 362   | 62 (-207.3, 331.7; 0.627)    | 511                            | 560   | 49 (-528.6, 626.7; 0.862)    |
| <b>Number of nights in hospital</b>           | 454                    | 451   | -4 (-100.6, 93.0; 0.936)    | 468                        | 575   | 107 (-390.2, 604.1; 0.658)   | 547                            | 734   | 187 (-380.7, 754.8; 0.503)   |
| <b>Total medication</b>                       | 203                    | 204   | 1 (-21.3, 23.6; 0.919)      | 134                        | 216   | 81 (23.2, 139.2; 0.009)      | 173                            | 216   | 43 (6.2, 80.1; 0.024)        |
| <b>Myocardial infarction</b>                  | 40                     | 40    | -0 (-32.7, 32.6; 0.996)     | 56                         | 81    | 25 (-96.9, 146.6; 0.675)     | 33                             | 32    | -1 (-34.0, 32.2; 0.954)      |
| <b>Cerebrovascular accident</b>               | 79                     | 57    | -22 (-56.7, 13.0; 0.209)    | 45                         | 75    | 30 (-127.8, 187.6; 0.697)    | 69                             | 52    | -17 (-120.4, 86.3; 0.737)    |
| <b>Further CABG</b>                           | 0                      | 17    | 17 (-5.0, 38.3; 0.126)      | 0                          | 0     | .                            | 0                              | 0     | .                            |
| <b>Further PCI</b>                            | 187                    | 157   | -30 (-107.2, 47.6; 0.436)   | 0                          | 154   | 154 (-31.8, 339.6; 0.099)    | 250                            | 214   | -37 (-136.7, 63.6; 0.459)    |
| <b>Revascularisation with catheter</b>        | 66                     | 69    | 3 (-45.1, 51.4; 0.895)      | 14                         | 60    | 47 (-42.6, 136.2; 0.288)     | 83                             | 129   | 45 (-32.7, 123.2; 0.242)     |
| <b>Sternal wound problems</b>                 | 68                     | 158   | 90 (-23.5, 204.2; 0.115)    | 307                        | 1395  | 1088 (-288.2, 2465.1; 0.115) | 206                            | 507   | 301 (-63.2, 665.5; 0.101)    |
| <b>Major bleed</b>                            | 32                     | 51    | 18 (-38.5, 75.2; 0.513)     | 0                          | 0     | .                            | 42                             | 23    | -19 (-121.6, 82.9; 0.699)    |
| <b>Other AEs (cost of hospital stay only)</b> | 1140                   | 1091  | -50 (-381.0, 281.8; 0.761)  | 2019                       | 2042  | 23 (-2647.5, 2694.0; 0.986)  | 1247                           | 1333  | 86 (-636.3, 809.0; 0.807)    |
| <b>Death (cost of hospital stay only)</b>     | 178                    | 82    | -96 (-195.2, 3.3; 0.057)    | 23                         | 785   | 761 (-171.5, 1694.1; 0.104)  | 242                            | 98    | -143 (-341.9, 55.2; 0.149)   |
| <b>Total cost at 5 years</b>                  | 17269                  | 17951 | 681 (-605.0, 1967.9; 0.285) | 18355                      | 24028 | 5673 (256.9, 11089.1; 0.041) | 17957                          | 19403 | 1447 (-438.1, 3331.3; 0.126) |

Total cost of index admission includes the total cost of surgery (Time in theatre (minutes), duration related theatre costs and staff, duration related anaesthetic costs, time on bypass (minutes), and other surgery costs (consumables, blood products, aprotinin), post-operative costs (Ventilation time, Intra-aortic balloon pump, Inotropic support, Renal support therapy, Hemofiltration) and any in hospital adverse events (Myocardial Infarction, Cerebrovascular accident, Further CABG, Further PCI, Revascularisation with catheter, Major bleed, Other AEs (cost of hospital stay only), Death (cost of hospital stay only))

S Table 5: Costs for subgroups: age groups

|                                               | Aged < 70 Yrs |       |                             | Aged >= 70 Yrs |       |                              |
|-----------------------------------------------|---------------|-------|-----------------------------|----------------|-------|------------------------------|
|                                               | SITA          | BITA  | BITA vs SITA                | SITA           | BITA  | BITA vs SITA                 |
| <b>Total cost of index admission</b>          | 11653         | 12401 | 748 (114.4, 1381.9; 0.023)  | 12562          | 13780 | 1218 (-84.8, 2521.3; 0.065)  |
| <b>Total costs of discharge locations</b>     | 380           | 429   | 49 (-99.4, 197.3; 0.502)    | 1126           | 887   | -238 (-1351.7, 875.3; 0.661) |
| <b>GP visits</b>                              | 846           | 862   | 16 (-28.3, 59.3; 0.471)     | 879            | 746   | -133 (-266.4, 1.3; 0.052)    |
| <b>Nurse visits</b>                           | 108           | 122   | 14 (-5.6, 33.3; 0.154)      | 159            | 165   | 6 (-41.6, 53.9; 0.791)       |
| <b>Outpatient clinic visits</b>               | 816           | 933   | 116 (-32.1, 264.9; 0.119)   | 838            | 1019  | 181 (-143.6, 506.5; 0.259)   |
| <b>Cardiac rehabilitation visits</b>          | 568           | 567   | -1 (-248.1, 245.7; 0.992)   | 707            | 767   | 60 (-228.4, 348.3; 0.670)    |
| <b>Number of nights in hospital</b>           | 446           | 442   | -4 (-118.9, 110.0; 0.936)   | 541            | 698   | 157 (-271.2, 584.8; 0.455)   |
| <b>Total medication</b>                       | 190           | 213   | 22 (1.9, 43.0; 0.033)       | 203            | 190   | -13 (-40.8, 14.1; 0.324)     |
| <b>Myocardial infarction</b>                  | 39            | 47    | 9 (-14.2, 31.6; 0.443)      | 42             | 23    | -19 (-54.7, 17.5; 0.297)     |
| <b>Cerebrovascular accident</b>               | 58            | 41    | -17 (-53.6, 20.1; 0.358)    | 121            | 102   | -19 (-110.8, 72.3; 0.667)    |
| <b>Revascularisation with catheter</b>        | 0             | 17    | 17 (-5.7, 40.0; 0.134)      | 0              | 0     | .                            |
| <b>Further CABG</b>                           | 222           | 179   | -43 (-148.8, 63.0; 0.412)   | 101            | 133   | 32 (-49.7, 113.2; 0.427)     |
| <b>Further PCI</b>                            | 70            | 86    | 16 (-28.0, 60.1; 0.459)     | 58             | 61    | 3 (-65.8, 71.3; 0.935)       |
| <b>Sternal wound problems</b>                 | 112           | 314   | 202 (-8.3, 413.2; 0.059)    | 88             | 246   | 158 (-11.2, 327.7; 0.066)    |
| <b>Major bleed</b>                            | 26            | 20    | -6 (-40.6, 28.7; 0.725)     | 50             | 106   | 56 (-90.0, 202.6; 0.433)     |
| <b>Other AEs (cost of hospital stay only)</b> | 874           | 1071  | 197 (-188.0, 582.1; 0.302)  | 2081           | 1533  | -549 (-1274.2, 176.9; 0.131) |
| <b>Death (cost of hospital stay only)</b>     | 67            | 100   | 32 (-33.3, 98.1; 0.320)     | 486            | 208   | -278 (-559.0, 3.1; 0.052)    |
| <b>Total cost at 5 years</b>                  | 16474         | 17842 | 1368 (640.7, 2095.1; 0.001) | 20042          | 20666 | 623 (-1986.6, 3233.0; 0.624) |

Total cost of index admission includes the total cost of surgery (Time in theatre (minutes), duration related theatre costs and staff, duration related anaesthetic costs, time on bypass (minutes), and other surgery costs (consumables, blood products, aprotinin), post-operative costs (Ventilation time, Intra-aortic balloon pump, Inotropic support, Renal support therapy, Hemofiltration) and any in hospital adverse events (Myocardial Infarction, Cerebrovascular accident, Further CABG, Further PCI, Revascularisation with catheter, Major bleed, Other AEs (cost of hospital stay only), Death (cost of hospital stay only))

S Table 6: Costs for subgroups: on/off pump

|                                               | Off-pump |       |                              | On-pump |       |                             |
|-----------------------------------------------|----------|-------|------------------------------|---------|-------|-----------------------------|
|                                               | SITA     | BITA  | BITA vs SITA                 | SITA    | BITA  | BITA vs SITA                |
| <b>Total cost of index admission</b>          | 11851    | 12018 | 167 (-863.9, 1197.9; 0.737)  | 12025   | 13509 | 1484 (884.9, 2082.5; 0.000) |
| <b>Total costs of discharge locations</b>     | 645      | 546   | -99 (-335.3, 137.6; 0.393)   | 538     | 554   | 16 (-501.0, 532.9; 0.950)   |
| <b>GP visits</b>                              | 706      | 699   | -7 (-41.0, 26.3; 0.650)      | 955     | 927   | -28 (-94.4, 38.4; 0.391)    |
| <b>Nurse visits</b>                           | 141      | 147   | 6 (-17.7, 30.1; 0.594)       | 110     | 123   | 14 (-11.0, 38.5; 0.262)     |
| <b>Outpatient clinic visits</b>               | 997      | 1194  | 197 (0.7, 393.4; 0.049)      | 707     | 788   | 81 (-11.7, 173.1; 0.084)    |
| <b>Cardiac rehabilitation visits</b>          | 834      | 620   | -214 (-422.4, -6.4; 0.044)   | 456     | 623   | 166 (-11.4, 344.1; 0.065)   |
| <b>Number of nights in hospital</b>           | 462      | 471   | 8 (-98.5, 114.8; 0.874)      | 481     | 540   | 59 (-160.0, 278.6; 0.581)   |
| <b>Total medication</b>                       | 205      | 215   | 10 (-11.0, 30.6; 0.333)      | 187     | 202   | 15 (-5.5, 35.4; 0.143)      |
| <b>Myocardial infarction</b>                  | 53       | 45    | -8 (-43.4, 27.4; 0.643)      | 31      | 39    | 8 (-10.9, 26.9; 0.389)      |
| <b>Cerebrovascular accident</b>               | 87       | 61    | -27 (-70.6, 17.6; 0.224)     | 68      | 56    | -12 (-62.5, 37.9; 0.617)    |
| <b>Revascularisation with catheter</b>        | 0        | 15    | 15 (-7.7, 38.3; 0.180)       | 0       | 11    | 11 (-12.1, 34.1; 0.335)     |
| <b>Further CABG</b>                           | 228      | 157   | -70 (-196.0, 55.5; 0.257)    | 165     | 177   | 12 (-63.8, 87.9; 0.746)     |
| <b>Further PCI</b>                            | 73       | 98    | 26 (-38.4, 90.2; 0.411)      | 63      | 67    | 4 (-43.7, 51.2; 0.871)      |
| <b>Sternal wound problems</b>                 | 41       | 273   | 232 (23.8, 439.4; 0.031)     | 149     | 319   | 170 (-37.0, 376.6; 0.103)   |
| <b>Major bleed</b>                            | 52       | 47    | -5 (-79.9, 70.7; 0.900)      | 20      | 40    | 20 (-42.1, 82.3; 0.511)     |
| <b>Other AEs (cost of hospital stay only)</b> | 1250     | 1223  | -27 (-280.0, 225.3; 0.823)   | 1184    | 1188  | 4 (-463.2, 471.4; 0.986)    |
| <b>Death (cost of hospital stay only)</b>     | 280      | 236   | -44 (-290.1, 202.0; 0.712)   | 118     | 53    | -65 (-141.8, 11.5; 0.092)   |
| <b>Total cost at 5 years</b>                  | 17905    | 18065 | 160 (-1181.9, 1501.2; 0.805) | 17256   | 19214 | 1958 (706.5, 3209.5; 0.004) |

Total cost of index admission includes the total cost of surgery (Time in theatre (minutes), duration related theatre costs and staff, duration related anaesthetic costs, time on bypass (minutes), and other surgery costs (consumables, blood products, aprotinin), post-operative costs (Ventilation time, Intra-aortic balloon pump, Inotropic support, Renal support therapy, Hemofiltration) and any in hospital adverse events (Myocardial Infarction, Cerebrovascular accident, Further CABG, Further PCI, Revascularisation with catheter, Major bleed, Other AEs (cost of hospital stay only), Death (cost of hospital stay only))



S Table 7: Costs for subgroups: baseline history of myocardial infarctions

|                                               | No prior myocardial infarction |       |                             | Prior myocardial infarction |       |                             |
|-----------------------------------------------|--------------------------------|-------|-----------------------------|-----------------------------|-------|-----------------------------|
|                                               | SITA                           | BITA  | BITA vs SITA                | SITA                        | BITA  | BITA vs SITA                |
| <b>Total cost of index admission</b>          | 11694                          | 12501 | 807 (32.2, 1582.4; 0.042)   | 12167                       | 13123 | 956 (227.9, 1684.2; 0.012)  |
| <b>Total costs of discharge locations</b>     | 530                            | 599   | 69 (-208.9, 346.7; 0.614)   | 654                         | 476   | -178 (-768.7, 412.4; 0.540) |
| <b>GP visits</b>                              | 853                            | 824   | -28 (-88.6, 31.6; 0.338)    | 859                         | 842   | -16 (-75.4, 42.5; 0.570)    |
| <b>Nurse visits</b>                           | 122                            | 130   | 8 (-10.8, 26.9; 0.387)      | 122                         | 138   | 16 (-9.2, 41.3; 0.201)      |
| <b>Outpatient clinic visits</b>               | 799                            | 851   | 52 (-36.3, 140.1; 0.236)    | 852                         | 1113  | 260 (49.8, 471.2; 0.017)    |
| <b>Cardiac rehabilitation visits</b>          | 657                            | 711   | 54 (-149.8, 257.9; 0.590)   | 541                         | 482   | -58 (-238.6, 121.6; 0.509)  |
| <b>Number of nights in hospital</b>           | 473                            | 507   | 34 (-127.0, 194.8; 0.667)   | 472                         | 511   | 40 (-111.0, 190.0; 0.592)   |
| <b>Total medication</b>                       | 192                            | 200   | 8 (-18.3, 34.0; 0.544)      | 196                         | 217   | 21 (-11.4, 53.3; 0.193)     |
| <b>Myocardial infarction</b>                  | 43                             | 32    | -11 (-39.7, 17.7; 0.436)    | 35                          | 54    | 19 (-14.8, 53.8; 0.253)     |
| <b>Cerebrovascular accident</b>               | 88                             | 47    | -40 (-82.0, 1.2; 0.056)     | 60                          | 73    | 13 (-34.0, 59.3; 0.581)     |
| <b>Revascularisation with catheter</b>        | 0                              | 11    | 11 (-11.7, 32.8; 0.338)     | 0                           | 16    | 16 (-14.7, 46.4; 0.296)     |
| <b>Further CABG</b>                           | 219                            | 174   | -45 (-126.0, 36.2; 0.265)   | 150                         | 156   | 6 (-114.4, 125.9; 0.922)    |
| <b>Further PCI</b>                            | 79                             | 60    | -19 (-59.5, 21.3; 0.340)    | 51                          | 109   | 58 (-8.7, 124.2; 0.085)     |
| <b>Sternal wound problems</b>                 | 141                            | 238   | 96 (-59.9, 252.0; 0.216)    | 59                          | 385   | 326 (86.8, 565.2; 0.010)    |
| <b>Major bleed</b>                            | 35                             | 48    | 13 (-50.6, 76.7; 0.677)     | 29                          | 34    | 5 (-48.7, 58.8; 0.847)      |
| <b>Other AEs (cost of hospital stay only)</b> | 1119                           | 1062  | -58 (-436.6, 321.2; 0.756)  | 1315                        | 1354  | 39 (-540.5, 618.5; 0.891)   |
| <b>Death (cost of hospital stay only)</b>     | 179                            | 95    | -84 (-271.8, 103.6; 0.365)  | 185                         | 178   | -8 (-205.2, 189.9; 0.937)   |
| <b>Total cost at 5 years</b>                  | 17222                          | 18088 | 866 (-151.5, 1883.2; 0.092) | 17746                       | 19260 | 1514 (8.9, 3019.0; 0.049)   |

Total cost of index admission includes the total cost of surgery (Time in theatre (minutes), duration related theatre costs and staff, duration related anaesthetic costs, time on bypass (minutes), and other surgery costs (consumables, blood products, aprotinin), post-operative costs (Ventilation time, Intra-aortic balloon pump, Inotropic support, Renal support therapy, Hemofiltration) and any in hospital adverse events (Myocardial Infarction, Cerebrovascular accident, Further CABG, Further PCI, Revascularisation with catheter, Major bleed, Other AEs (cost of hospital stay only), Death (cost of hospital stay only))

S Table 8: Costs for subgroups: NYHA class

|                                               | NYHA class I & II |       |                             | NYHA class III & IV |       |                             |
|-----------------------------------------------|-------------------|-------|-----------------------------|---------------------|-------|-----------------------------|
|                                               | SITA              | BITA  | BITA vs SITA                | SITA                | BITA  | BITA vs SITA                |
| <b>Total cost of index admission</b>          | 12022             | 12869 | 847 (174.1, 1519.6; 0.016)  | 11451               | 12394 | 943 (-50.7, 1937.5; 0.062)  |
| <b>Total costs of discharge locations</b>     | 609               | 466   | -142 (-394.1, 110.0; 0.256) | 493                 | 837   | 344 (-576.5, 1263.6; 0.448) |
| <b>GP visits</b>                              | 891               | 875   | -16 (-65.7, 33.0; 0.500)    | 717                 | 681   | -36 (-135.9, 63.9; 0.463)   |
| <b>Nurse visits</b>                           | 113               | 124   | 10 (-9.1, 29.6; 0.285)      | 153                 | 166   | 13 (-26.8, 53.3; 0.500)     |
| <b>Outpatient clinic visits</b>               | 786               | 840   | 54 (-51.8, 160.7; 0.301)    | 957                 | 1357  | 400 (-87.9, 887.5; 0.103)   |
| <b>Cardiac rehabilitation visits</b>          | 594               | 633   | 38 (-122.9, 199.9; 0.628)   | 650                 | 572   | -78 (-373.3, 217.9; 0.592)  |
| <b>Number of nights in hospital</b>           | 482               | 436   | -46 (-131.6, 40.3; 0.283)   | 437                 | 763   | 327 (-166.6, 820.2; 0.184)  |
| <b>Total medication</b>                       | 197               | 208   | 10 (-9.8, 30.7; 0.298)      | 179                 | 203   | 24 (-9.8, 58.7; 0.152)      |
| <b>Myocardial infarction</b>                  | 37                | 34    | -3 (-27.4, 20.7; 0.777)     | 48                  | 65    | 17 (-11.5, 46.5; 0.225)     |
| <b>Cerebrovascular accident</b>               | 77                | 67    | -10 (-46.5, 26.0; 0.567)    | 69                  | 24    | -45 (-97.6, 6.6; 0.084)     |
| <b>Revascularisation with catheter</b>        | 0                 | 16    | 16 (-5.4, 38.0; 0.134)      | 0                   | 0     | 0 (., .; .)                 |
| <b>Further CABG</b>                           | 186               | 168   | -18 (-85.1, 48.5; 0.577)    | 186                 | 162   | -24 (-141.8, 94.7; 0.685)   |
| <b>Further PCI</b>                            | 53                | 67    | 14 (-22.2, 51.1; 0.424)     | 112                 | 121   | 9 (-106.1, 123.4; 0.877)    |
| <b>Sternal wound problems</b>                 | 111               | 302   | 191 (-14.2, 396.1; 0.067)   | 84                  | 277   | 193 (-78.3, 463.8; 0.155)   |
| <b>Major bleed</b>                            | 25                | 31    | 6 (-45.4, 56.8; 0.820)      | 61                  | 84    | 23 (-92.9, 138.6; 0.687)    |
| <b>Other AEs (cost of hospital stay only)</b> | 1149              | 1048  | -100 (-485.2, 284.8; 0.597) | 1423                | 1694  | 271 (-351.2, 893.1; 0.377)  |
| <b>Death (cost of hospital stay only)</b>     | 225               | 113   | -112 (-269.3, 45.7; 0.156)  | 21                  | 181   | 161 (-9.5, 331.2; 0.063)    |
| <b>Total cost at 5 years</b>                  | 17556             | 18296 | 740 (-246.3, 1726.0; 0.135) | 17039               | 19582 | 2542 (375.6, 4708.6; 0.023) |

Total cost of index admission includes the total cost of surgery (Time in theatre (minutes), duration related theatre costs and staff, duration related anaesthetic costs, time on bypass (minutes), and other surgery costs (consumables, blood products, aprotinin), post-operative costs (Ventilation time, Intra-aortic balloon pump, Inotropic support, Renal support therapy, Hemofiltration) and any in hospital adverse events (Myocardial Infarction, Cerebrovascular accident, Further CABG, Further PCI, Revascularisation with catheter, Major bleed, Other AEs (cost of hospital stay only), Death (cost of hospital stay only))

S Table 9: Costs for subgroups: CCS class

|                                               | CCS class 0, I, II |       |                             | CCS class III, IVa/b/c |       |                             |
|-----------------------------------------------|--------------------|-------|-----------------------------|------------------------|-------|-----------------------------|
|                                               | SITA               | BITA  | BITA vs SITA                | SITA                   | BITA  | BITA vs SITA                |
| <b>Total cost of index admission</b>          | 12045              | 12825 | 779 (107.5, 1451.0; 0.025)  | 11572                  | 12627 | 1055 (50.1, 2059.7; 0.040)  |
| <b>Total costs of discharge locations</b>     | 498                | 468   | -30 (-231.8, 171.6; 0.761)  | 779                    | 726   | -53 (-995.9, 889.2; 0.908)  |
| <b>GP visits</b>                              | 856                | 820   | -36 (-91.0, 19.1; 0.201)    | 853                    | 856   | 3 (-83.0, 89.4; 0.942)      |
| <b>Nurse visits</b>                           | 118                | 130   | 12 (-10.5, 33.6; 0.305)     | 130                    | 140   | 10 (-16.6, 37.1; 0.453)     |
| <b>Outpatient clinic visits</b>               | 775                | 788   | 13 (-100.4, 126.0; 0.825)   | 929                    | 1321  | 392 (19.3, 764.2; 0.039)    |
| <b>Cardiac rehabilitation visits</b>          | 639                | 640   | 1 (-155.8, 158.2; 0.988)    | 531                    | 574   | 43 (-161.8, 247.8; 0.680)   |
| <b>Number of nights in hospital</b>           | 478                | 436   | -43 (-160.0, 74.4; 0.474)   | 458                    | 669   | 211 (-119.5, 542.0; 0.210)  |
| <b>Total medication</b>                       | 194                | 199   | 5 (-19.8, 30.5; 0.678)      | 193                    | 222   | 30 (-9.2, 68.5; 0.135)      |
| <b>Myocardial infarction</b>                  | 42                 | 33    | -10 (-36.8, 17.4; 0.484)    | 33                     | 59    | 26 (-16.1, 68.4; 0.224)     |
| <b>Cerebrovascular accident</b>               | 84                 | 62    | -21 (-64.9, 22.1; 0.334)    | 56                     | 46    | -10 (-63.0, 43.1; 0.712)    |
| <b>Revascularisation with catheter</b>        | 0                  | 18    | 18 (-6.9, 43.8; 0.154)      | 0                      | 0     | .                           |
| <b>Further CABG</b>                           | 174                | 152   | -22 (-95.6, 51.6; 0.557)    | 222                    | 199   | -23 (-149.7, 103.1; 0.718)  |
| <b>Further PCI</b>                            | 53                 | 65    | 12 (-25.7, 50.5; 0.524)     | 98                     | 110   | 12 (-60.3, 84.3; 0.745)     |
| <b>Sternal wound problems</b>                 | 117                | 330   | 213 (46.3, 380.5; 0.012)    | 79                     | 223   | 144 (-15.4, 302.6; 0.077)   |
| <b>Major bleed</b>                            | 28                 | 27    | -1 (-52.6, 51.5; 0.982)     | 42                     | 75    | 33 (-63.1, 129.0; 0.501)    |
| <b>Other AEs (cost of hospital stay only)</b> | 1231               | 1043  | -188 (-572.5, 196.1; 0.337) | 1144                   | 1519  | 375 (-271.2, 1022.0; 0.255) |
| <b>Death (cost of hospital stay only)</b>     | 238                | 148   | -90 (-243.5, 64.3; 0.254)   | 55                     | 85    | 30 (-104.4, 165.0; 0.659)   |
| <b>Total cost at 5 years</b>                  | 17571              | 18185 | 614 (-497.7, 1725.8; 0.266) | 17175                  | 19452 | 2278 (97.8, 4457.7; 0.041)  |

Total cost of index admission includes the total cost of surgery (Time in theatre (minutes), duration related theatre costs and staff, duration related anaesthetic costs, time on bypass (minutes), and other surgery costs (consumables, blood products, aprotinin), post-operative costs (Ventilation time, Intra-aortic balloon pump, Inotropic support, Renal support therapy, Hemofiltration) and any in hospital adverse events (Myocardial Infarction, Cerebrovascular accident, Further CABG, Further PCI, Revascularisation with catheter, Major bleed, Other AEs (cost of hospital stay only), Death (cost of hospital stay only))

S Table 10: Costs for subgroups: by selected country

|                                               | UK    |       |                             | Poland |       |                             | Australia |       |                              |
|-----------------------------------------------|-------|-------|-----------------------------|--------|-------|-----------------------------|-----------|-------|------------------------------|
|                                               | SITA  | BITA  | BITA vs SITA                | SITA   | BITA  | BITA vs SITA                | SITA      | BITA  | BITA vs SITA                 |
| <b>Total cost of index admission</b>          | 11809 | 12518 | 709 (53.8, 1364.3; 0.034)   | 11218  | 12329 | 1111 (478.1, 1744.0; 0.001) | 15268     | 15772 | 504 (-1234.3, 2243.2; 0.568) |
| <b>Total costs of discharge locations</b>     | 538   | 475   | -63 (-436.3, 309.5; 0.739)  | 871    | 881   | 10 (-191.9, 211.9; 0.923)   | 211       | 181   | -30 (-238.9, 178.3; 0.775)   |
| <b>GP visits</b>                              | 697   | 700   | 3 (-38.4, 44.4; 0.887)      | 1328   | 1340  | 12 (-86.0, 110.4; 0.807)    | 1596      | 1353  | -243 (-468.1, -18.1; 0.034)  |
| <b>Nurse visits</b>                           | 176   | 189   | 13 (-10.2, 35.2; 0.280)     | 15     | 20    | 5 (-5.3, 15.1; 0.346)       | 43        | 6     | -36 (-108.3, 35.8; 0.322)    |
| <b>Outpatient clinic visits</b>               | 891   | 1048  | 157 (-45.3, 359.5; 0.128)   | 695    | 872   | 177 (-14.6, 368.9; 0.070)   | 663       | 625   | -38 (-168.8, 92.3; 0.564)    |
| <b>Cardiac rehabilitation visits</b>          | 845   | 855   | 10 (-173.7, 193.3; 0.916)   | 126    | 111   | -15 (-103.0, 72.7; 0.734)   | 322       | 368   | 46 (-166.7, 259.2; 0.666)    |
| <b>Number of nights in hospital</b>           | 531   | 536   | 5 (-115.7, 126.1; 0.933)    | 381    | 258   | -123 (-300.7, 53.7; 0.171)  | 280       | 326   | 46 (-174.2, 266.7; 0.679)    |
| <b>Total medication</b>                       | 206   | 221   | 15 (-12.9, 41.9; 0.298)     | 149    | 157   | 9 (-23.6, 40.9; 0.598)      | 123       | 139   | 16 (-21.2, 53.4; 0.396)      |
| <b>Myocardial infarction</b>                  | 51    | 50    | -2 (-33.7, 30.3; 0.918)     | 7      | 15    | 8 (-16.9, 32.7; 0.533)      | 47        | 23    | -24 (-102.3, 54.7; 0.551)    |
| <b>Cerebrovascular accident</b>               | 76    | 61    | -15 (-56.6, 27.4; 0.495)    | 57     | 24    | -33 (-93.8, 27.7; 0.285)    | 43        | 147   | 103 (-89.0, 295.7; 0.290)    |
| <b>Further CABG</b>                           | 0     | 19    | 19 (-7.5, 45.5; 0.159)      | 0      | 0     | .                           | 0         | 0     | .                            |
| <b>Further PCI</b>                            | 226   | 175   | -51 (-136.8, 35.5; 0.249)   | 72     | 106   | 34 (-59.9, 127.8; 0.478)    | 154       | 97    | -57 (-271.6, 158.0; 0.603)   |
| <b>Revascularisation with catheter</b>        | 91    | 95    | 4 (-43.7, 51.3; 0.875)      | 0      | 49    | 49 (2.4, 94.8; 0.039)       | 0         | 0     | .                            |
| <b>Sternal wound problems</b>                 | 126   | 296   | 170 (16.7, 324.1; 0.030)    | 72     | 184   | 112 (-102.8, 327.8; 0.305)  | 69        | 948   | 879 (-74.5, 1832.1; 0.071)   |
| <b>Major bleed</b>                            | 39    | 52    | 13 (-50.6, 75.9; 0.695)     | 34     | 0     | -34 (-101.5, 34.2; 0.330)   | 0         | 0     | .                            |
| <b>Other AEs (cost of hospital stay only)</b> | 1525  | 1429  | -96 (-578.2, 386.6; 0.697)  | 605    | 364   | -241 (-501.3, 18.5; 0.069)  | 792       | 1766  | 974 (56.8, 1890.7; 0.038)    |
| <b>Death (cost of hospital stay only)</b>     | 225   | 146   | -78 (-234.5, 77.8; 0.325)   | 61     | 100   | 40 (-179.0, 258.5; 0.721)   | 267       | 16    | -251 (-525.6, 22.7; 0.072)   |
| <b>Total cost at 5 years</b>                  | 18052 | 18864 | 813 (-306.3, 1931.6; 0.154) | 15691  | 16811 | 1120 (130.3, 2109.3; 0.027) | 19878     | 21767 | 1889 (-682.2, 4460.4; 0.149) |

Total cost of index admission includes the total cost of surgery (Time in theatre (minutes), duration related theatre costs and staff, duration related anaesthetic costs, time on bypass (minutes), and other surgery costs (consumables, blood products, aprotinin), post-operative costs (Ventilation time, Intra-aortic balloon pump, Inotropic support, Renal support therapy, Hemofiltration) and any in hospital adverse events (Myocardial Infarction, Cerebrovascular accident, Further CABG, Further PCI, Revascularisation with catheter, Major bleed, Other AEs (cost of hospital stay only), Death (cost of hospital stay only))

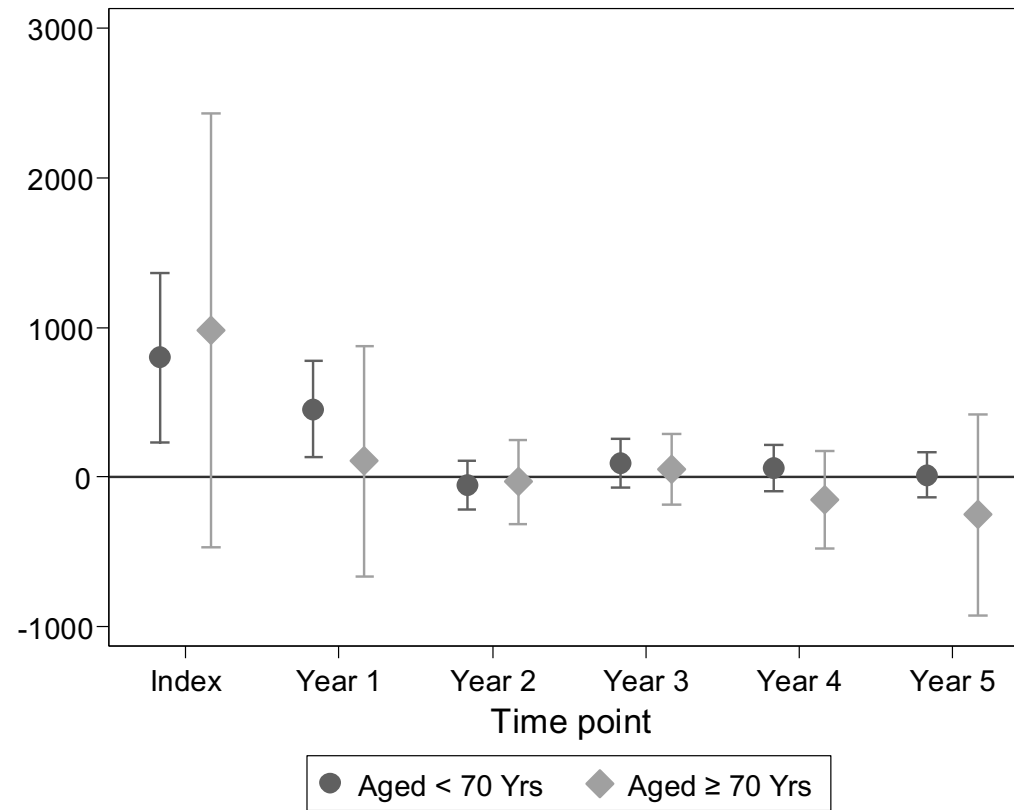

Figure S1 Differences in mean total costs (BITA vs SITA) by age groups over time

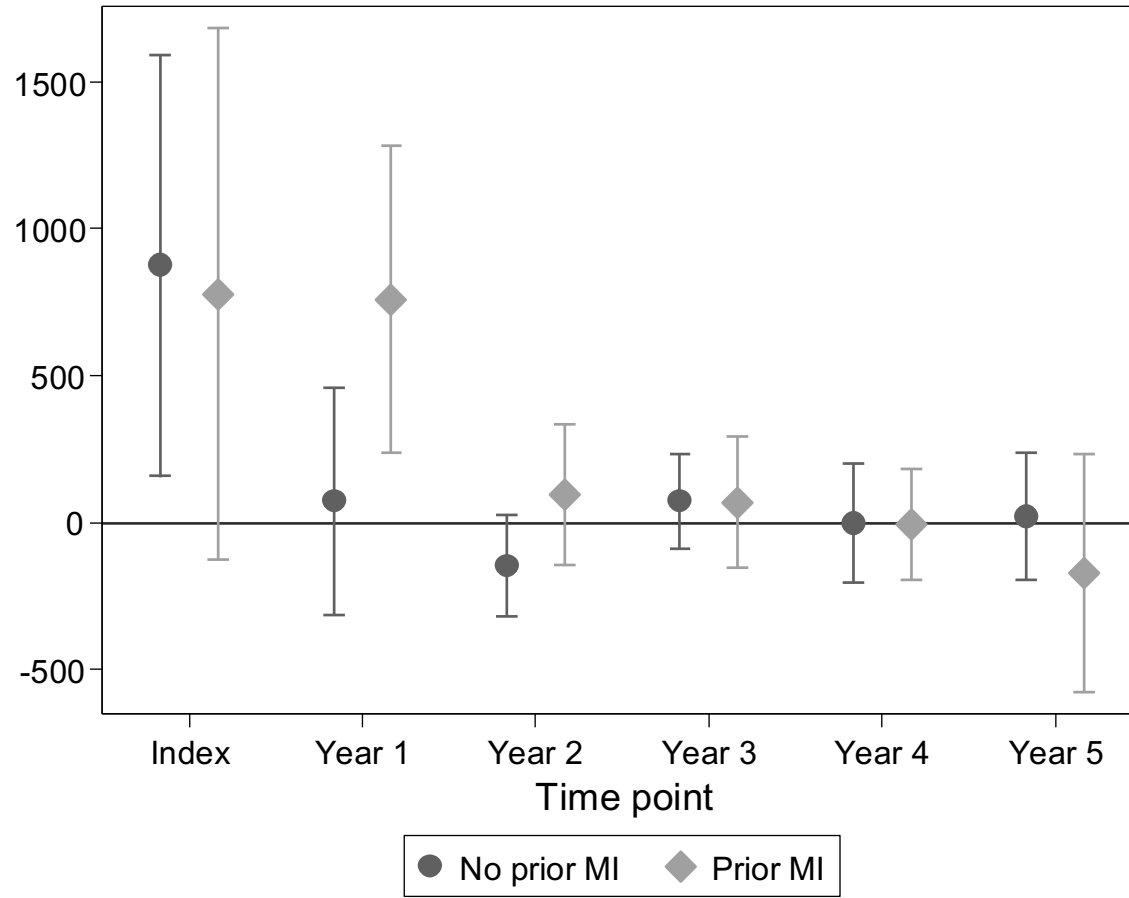

Figure S2 Differences in mean total costs (BITA vs SITA) by baseline prior history of myocardial infarction (MI) over time

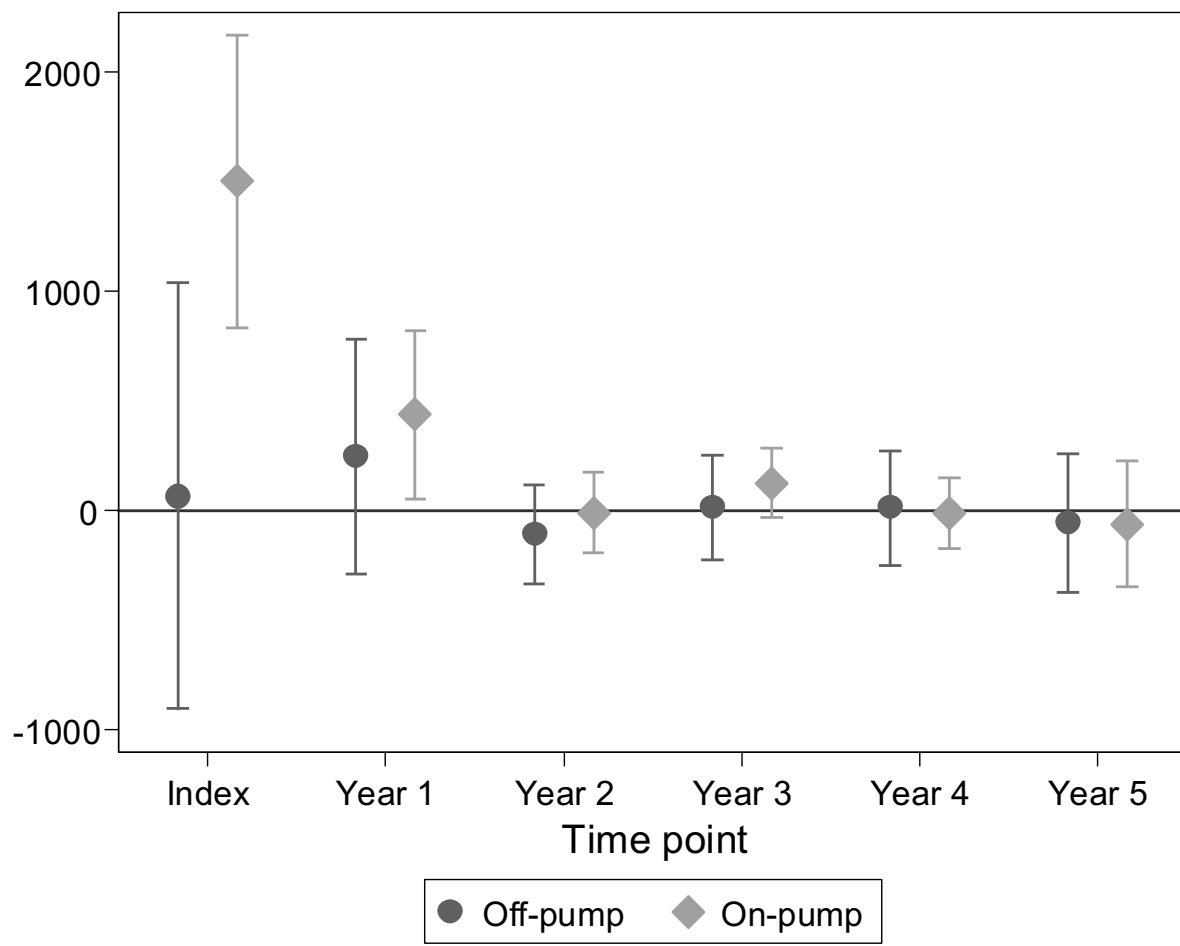

Figure S3 Differences in mean total costs (BITA vs SITA) by cardiopulmonary bypass over time

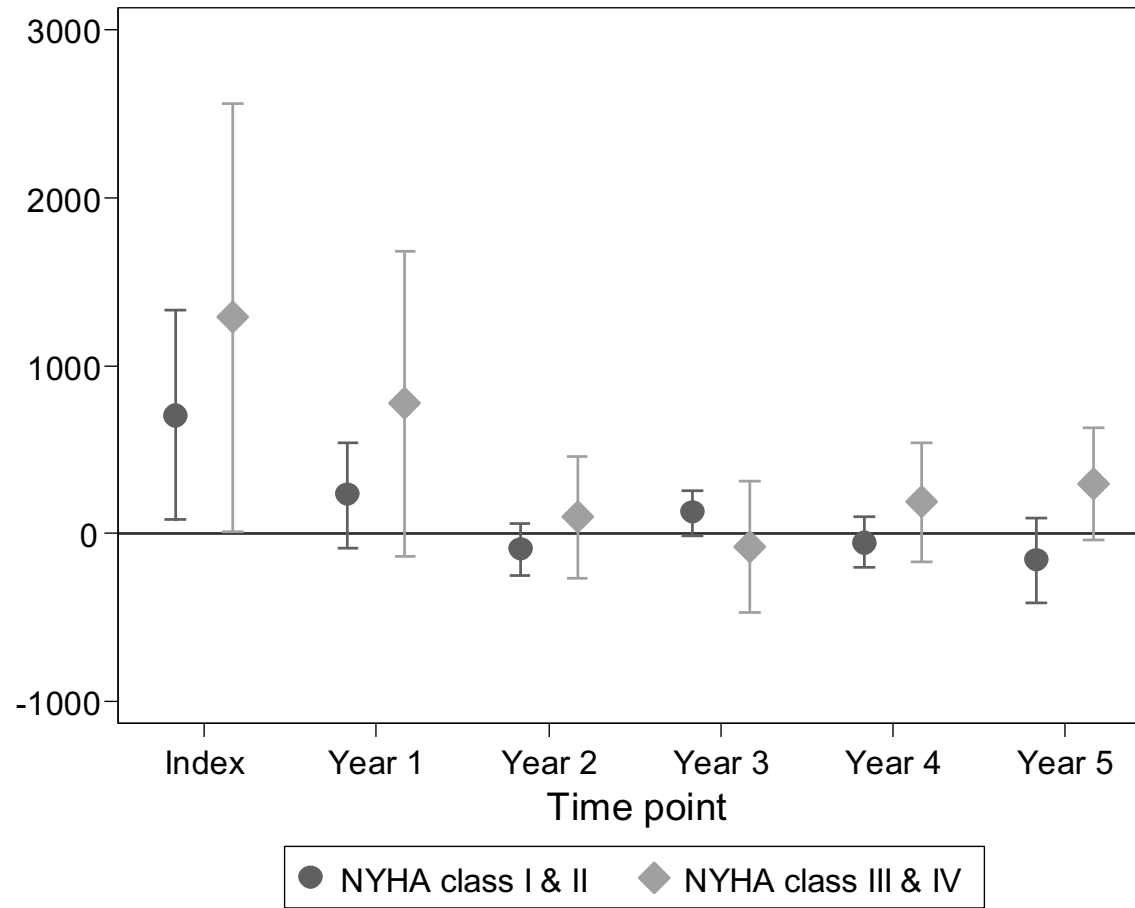

Figure S4 Differences in mean total costs (BITA vs SITA) by baseline New York Heart Association (NYHA) classification over time



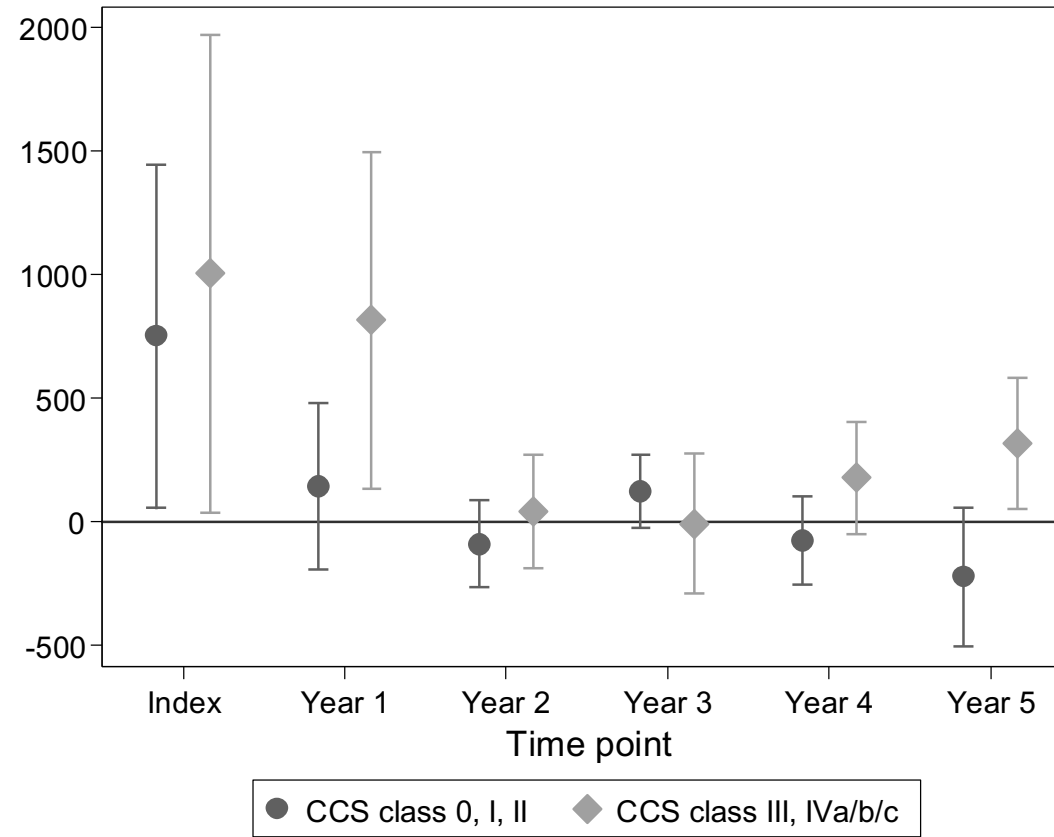

Figure 5 Differences in mean total costs (BITA vs SITA) by baseline Canadian Cardiovascular Society grading over time

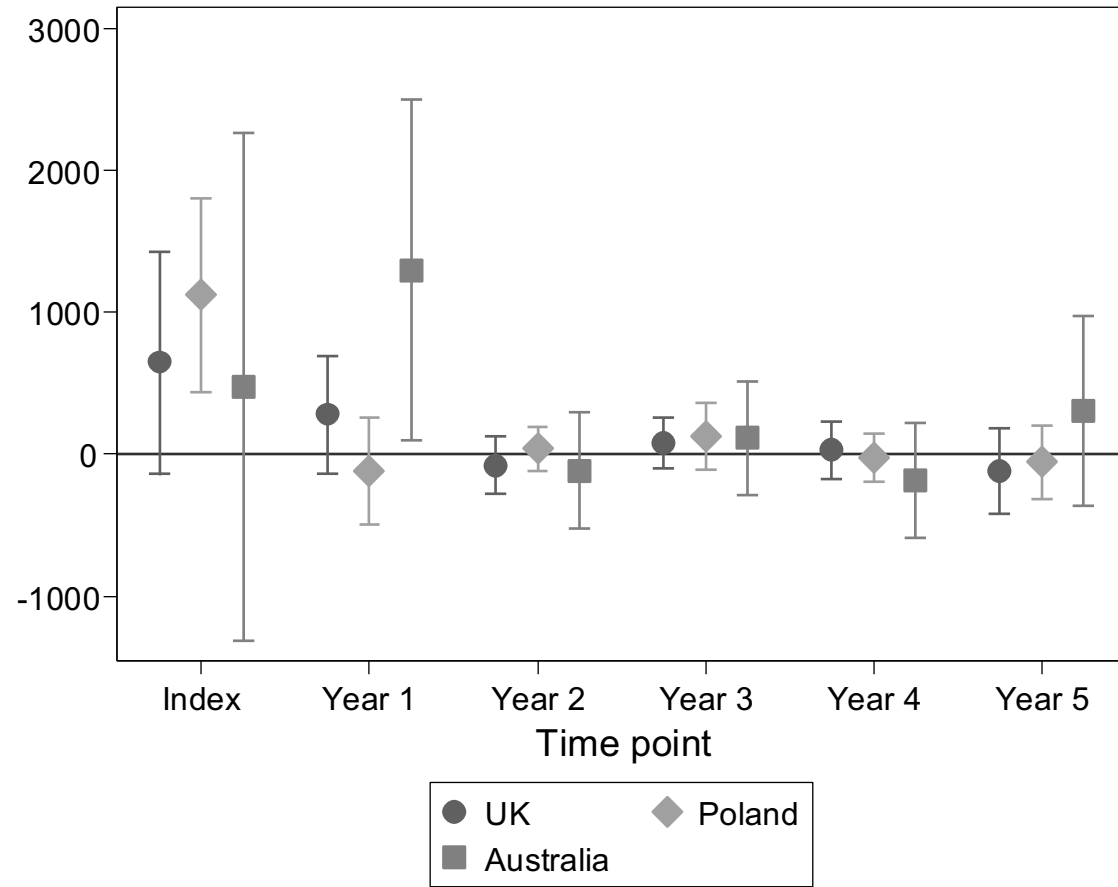

Figure S6 Differences in mean total costs (BITA vs SITA) by country over time

S Table 11: Mean and median total cost to five year follow-up

|        | SITA  | BITA  | BITA vs SITA            |
|--------|-------|-------|-------------------------|
| Mean   | 17480 | 18629 | 1149 (139, 2159; 0.027) |
| Median | 14528 | 15609 | 1081 (584, 1577; 0.000) |

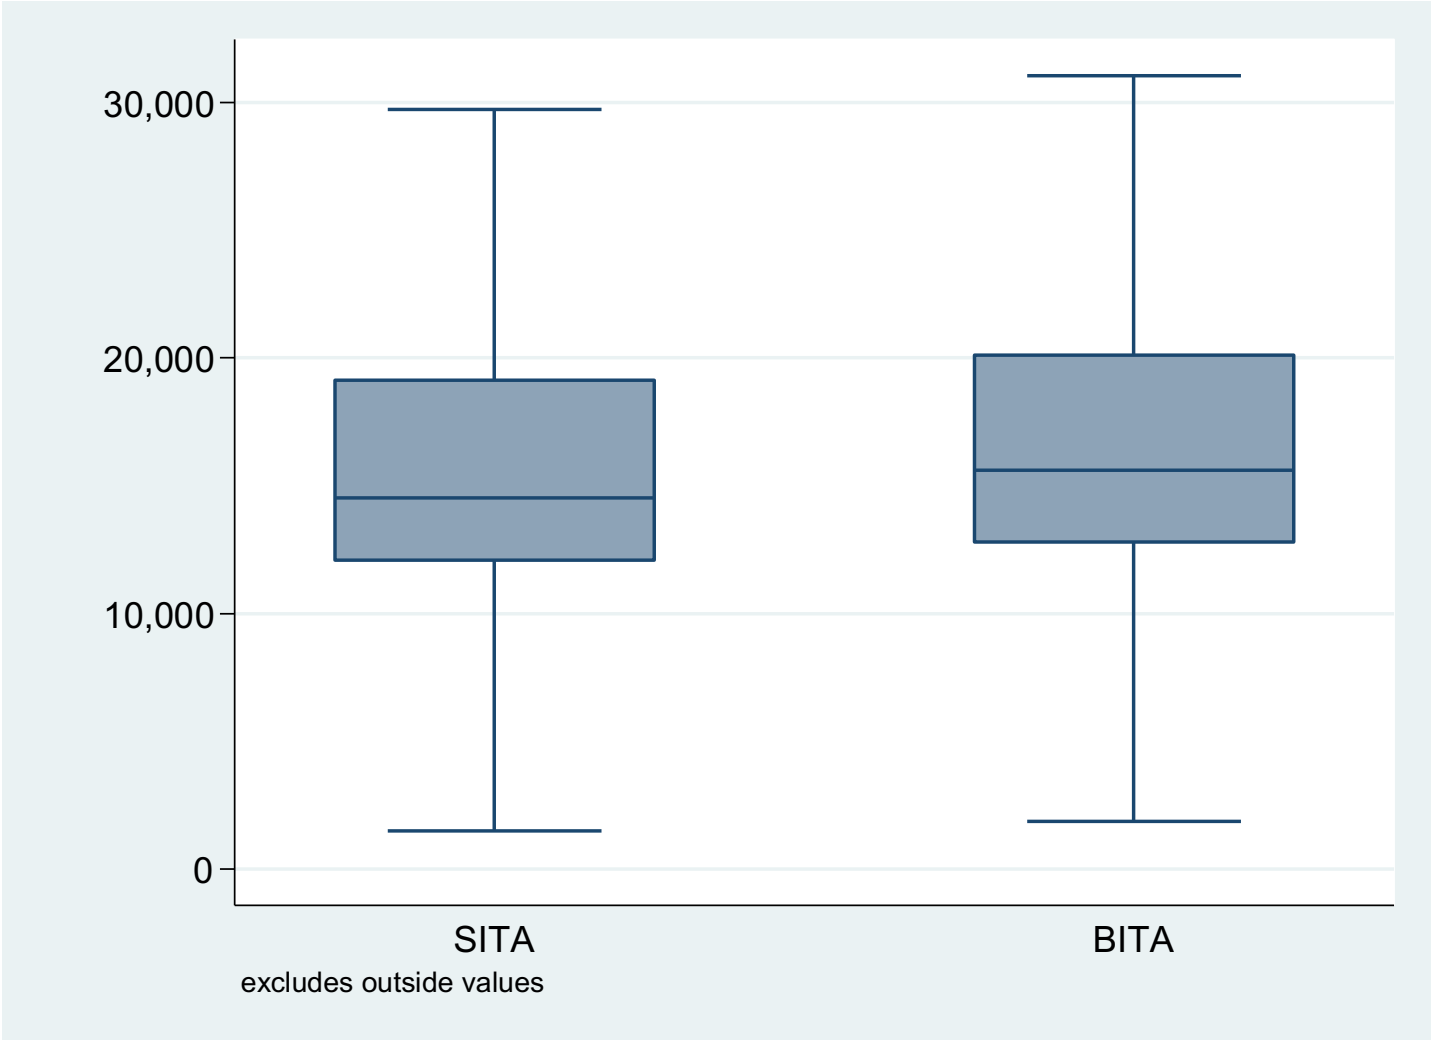

Figure S7 Boxplots of total costs to five year follow up (excluding outliers). Complete cases only.

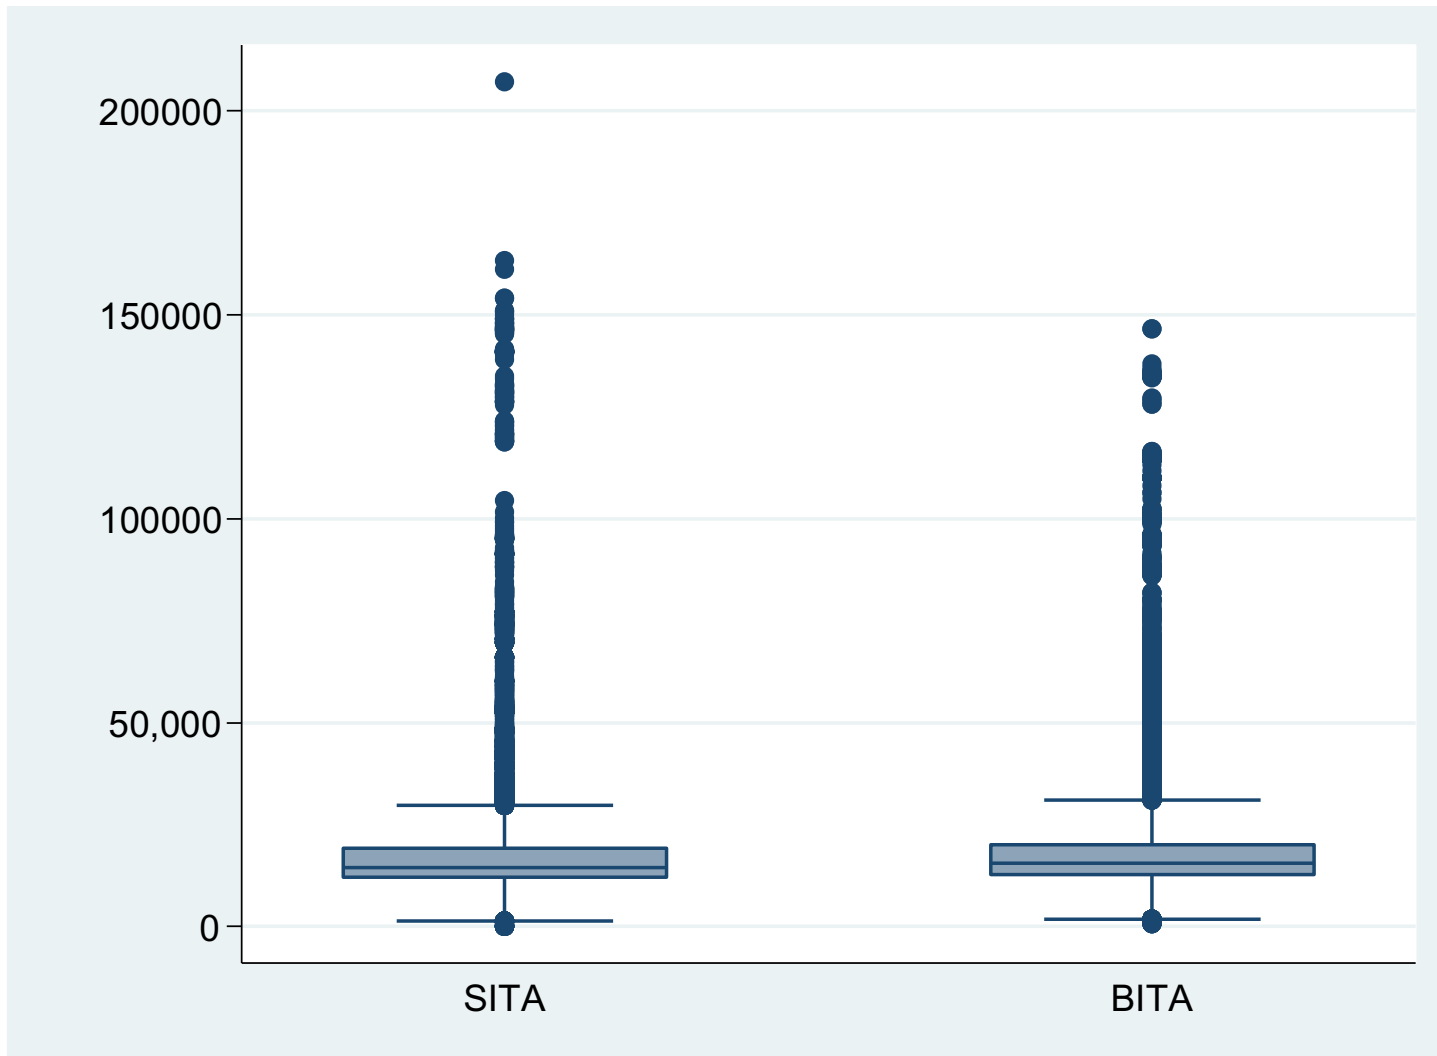

Figure S8 Boxplots of total costs to five year follow up (including outliers). Complete cases only.

S Table 12: Comparison of OLS and GLM estimates

|                       | SITA   | BITA   | BITA vs SITA (p-value) |
|-----------------------|--------|--------|------------------------|
| OLS                   | 17,480 | 18,629 | 1149 (0.027)           |
| GLM (Gamma, log link) | 17,480 | 18,629 | 1149 (0.000)           |

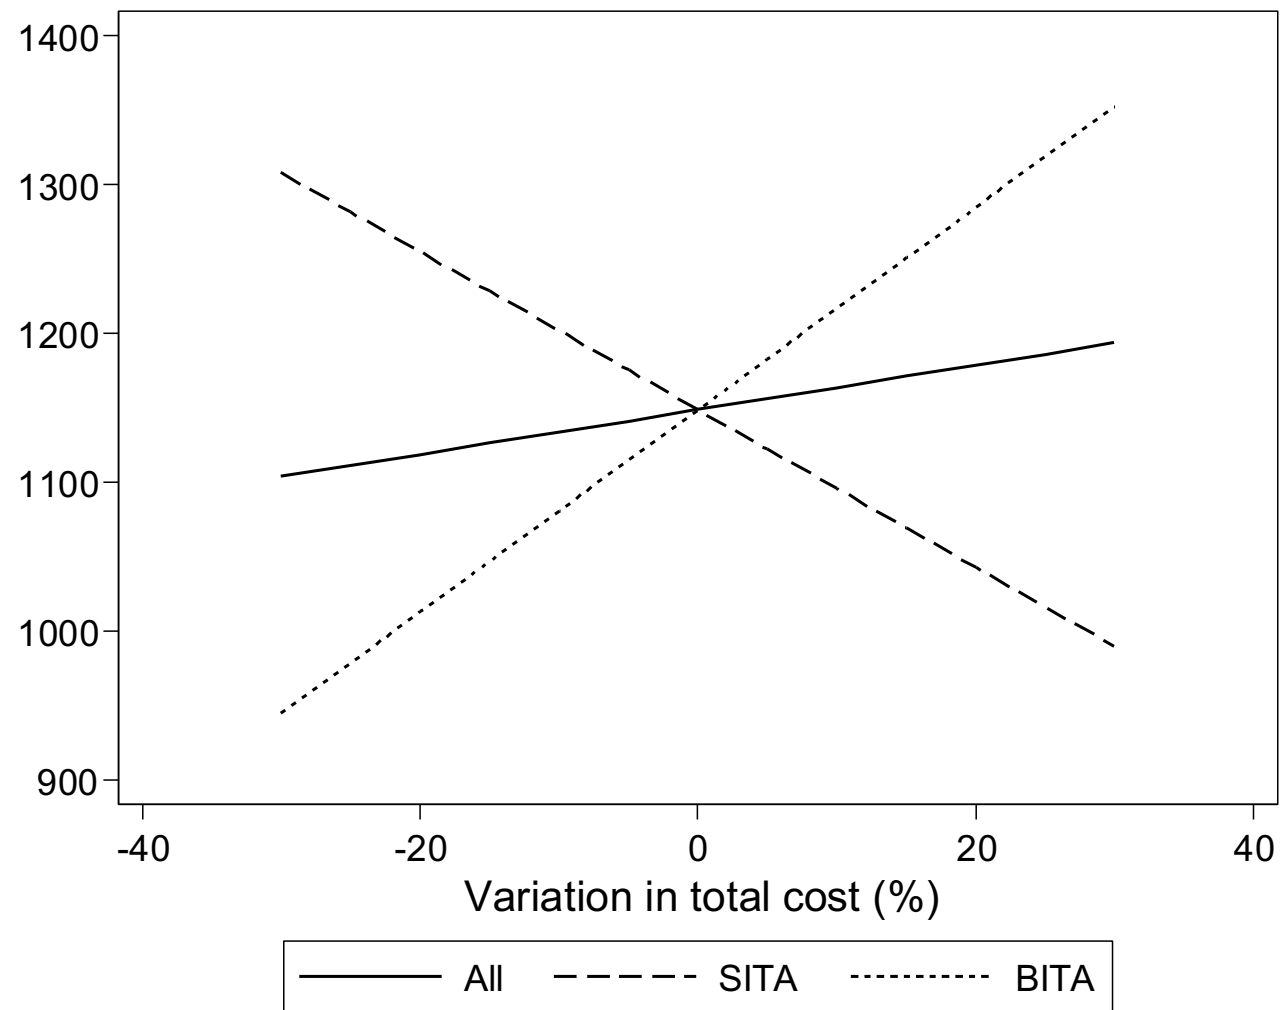

Figure S9 Sensitivity analysis assuming data are missing not at random. Imputed costs are varied between -30% and 30% at 5% point intervals.
